# Supplementary material
Source: MDPI journal article supplement (https://www.mdpi.com/1999-4907/11/4/434)

# Spearman Correlation Analysis

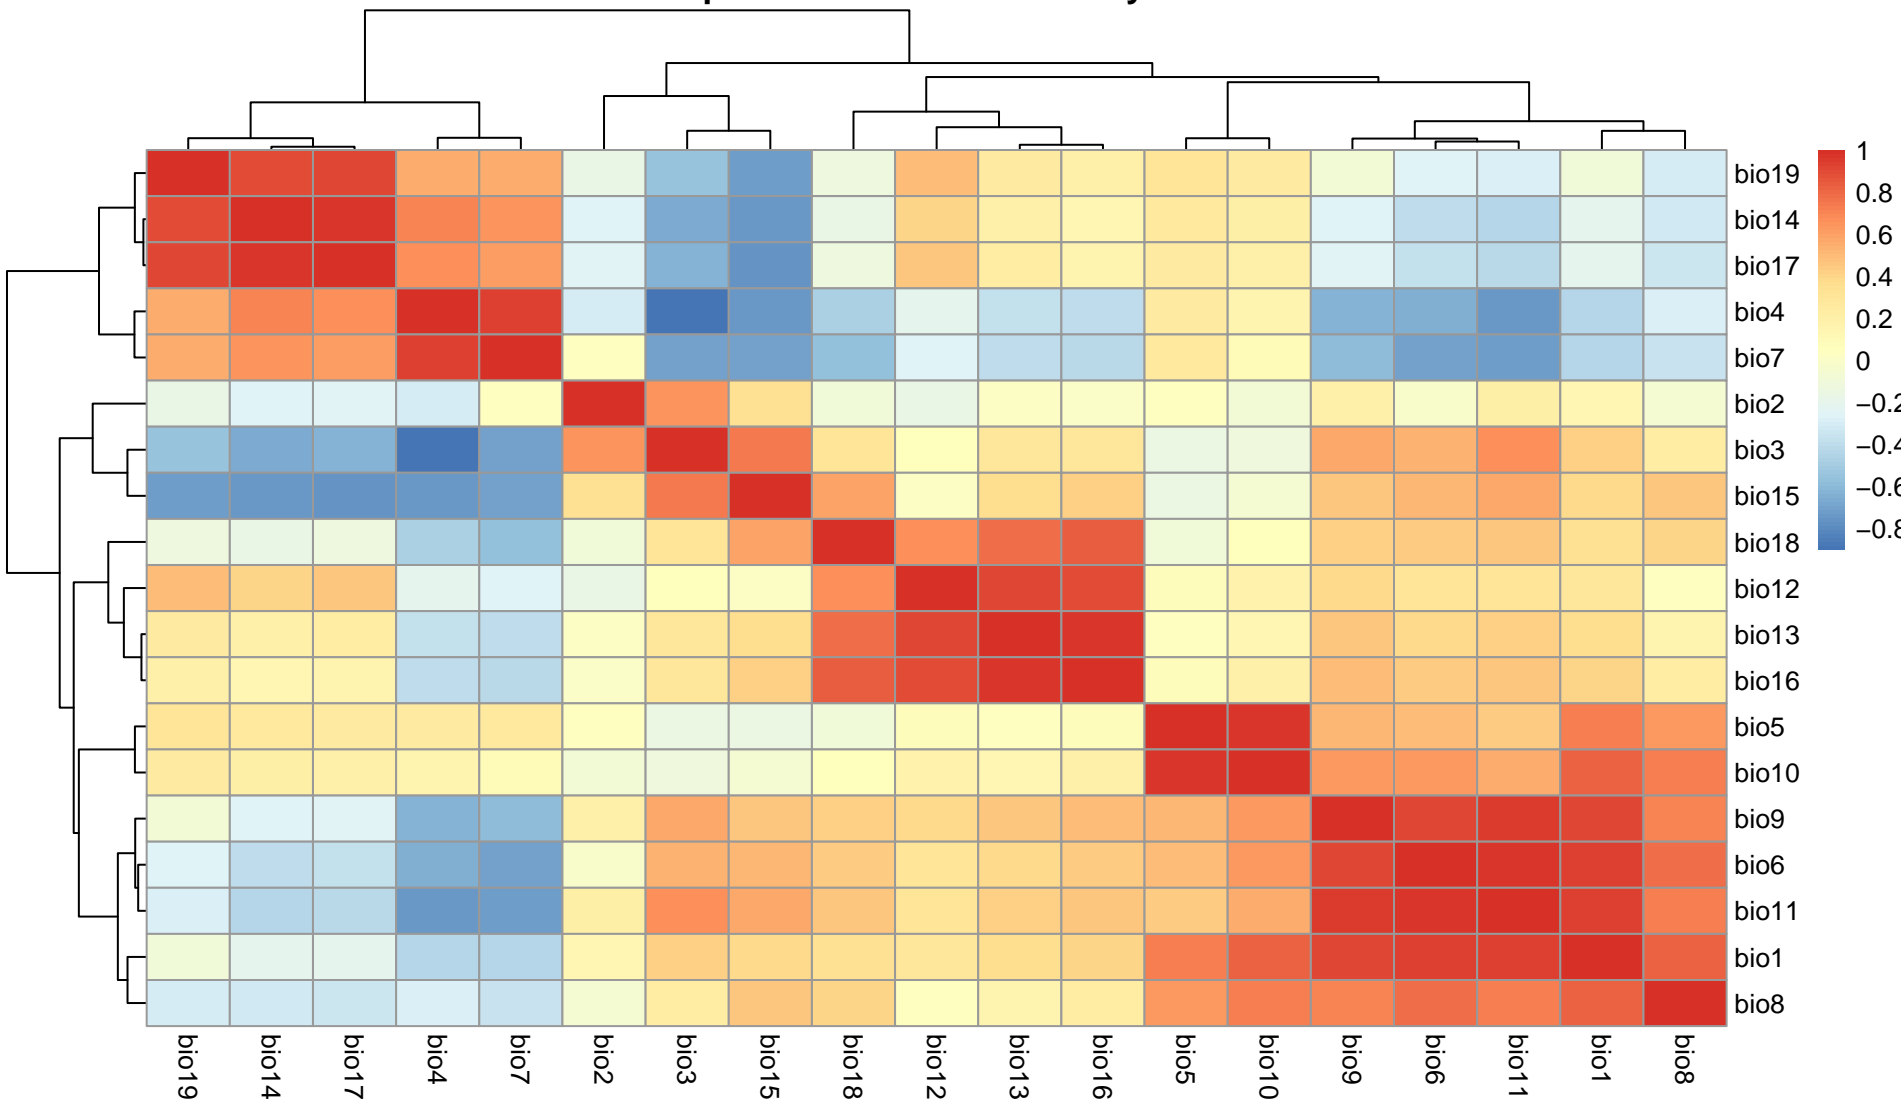

Supplement: s1 [file s1]
